# Supplementary material
Source: Springer Nature journal article supplement (https://www.springermedizin.de/resource/supplementary/12877_2006_77_MOESM1_ESM.pdf/9441120)
Supplement: MOESM1 [file 9441120]

4024 potentially relevant  
abstracts and 573 cross-  
references identified

3861 reports excluded (e.g.,  
hospital-based setting; randomized  
controlled trial; prediction of nursing  
home placement not considered)

736 reports obtained  
for further evaluation

22 reports unavailable  
for retrieval

615 reports excluded

- 292 nursing home placement  
not outcome
- 62 cross-sectional design
- 57 randomized/quasi-  
experimental/unknown study  
design
- 120 disease-specific (e.g.,  
dementia)
- 27 not community-based
- 28 non-random sample
- 29 not based in U.S.

101 reports included  
(one study reported 3  
separate analyses)  
across 25 data  
sources

13 data sources/24  
reports excluded due  
to inadequate data,  
non-representative  
sample, sample  
stratification,  
incomparable  
analyses

12 data sources/77  
reports included
